# Supplementary material for: Fluorescence-based measurements for the determination of nitrite using a coumarin derivative sensor based on inner filter effect
Source: Royal Society of Chemistry journal article supplement (doi:10.1039/c9ay02431j), 2020-01-01
Supplement: c9ay02431j1.pdf [file c9ay02431j1.pdf]

## Supporting information

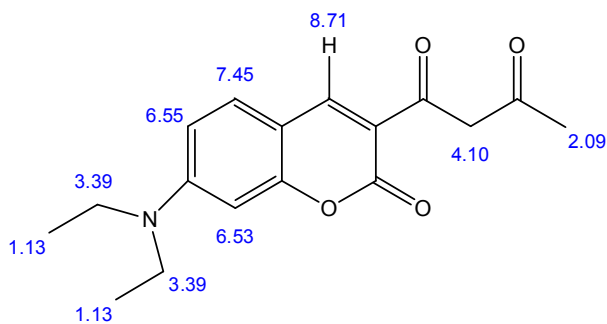

Fig. S1 Chemical NMR H-1 estimation of ADC.

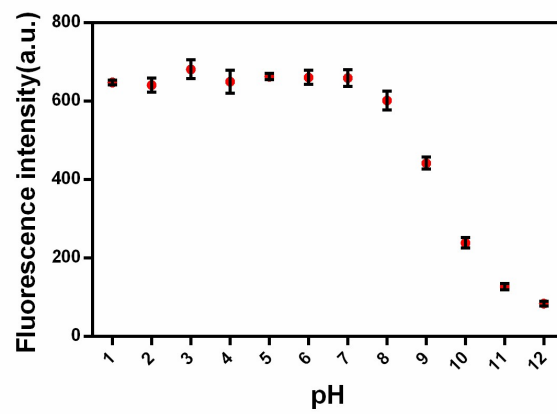

Fig. S2 The dependence of the fluorescence intensity of ADC on pH.

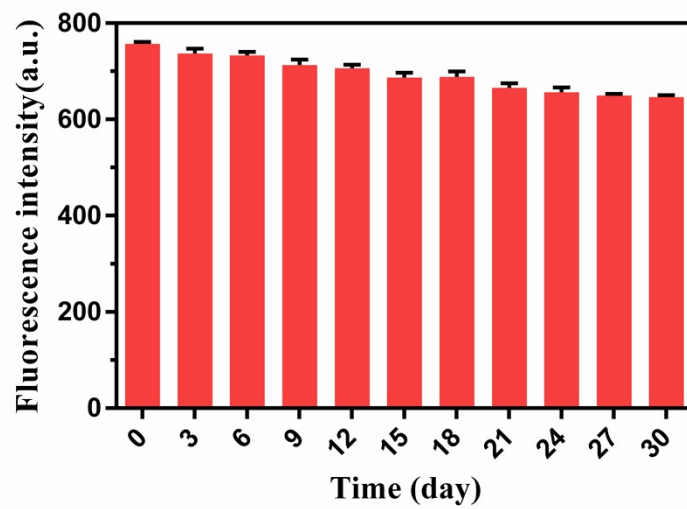

Fig. S3 The stability of the as-prepared sensor upon time.

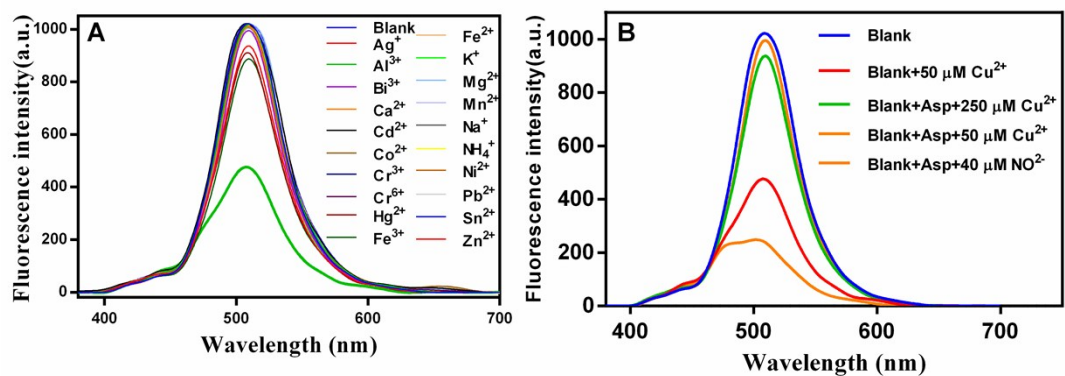

Fig. S4 Fluorescence emission spectra of ADC in the presence of various metal ions (50  $\mu\text{M}$ ) (A); The addition of Asp to improve the selectivity of proposed method (B).
